# Supplementary material for: Common DNA sequence variation influences 3-dimensional conformation of the human genome
Source: PubMed Central journal article supplement (PMC6883528; doi:10.1186/s13059-019-1855-4), 2019-11-28
Supplement: 13059_2019_1855_MOESM1_ESM.pdf [file 13059_2019_1855_MOESM1_ESM.pdf]

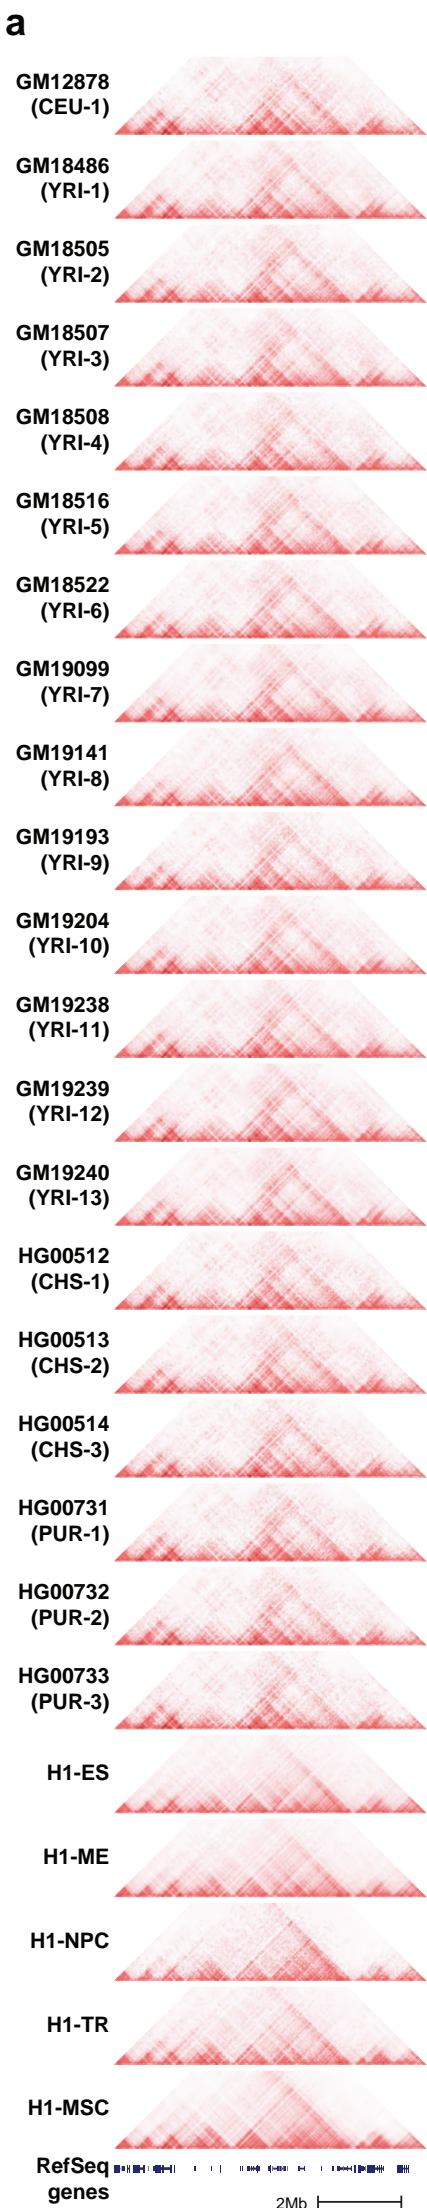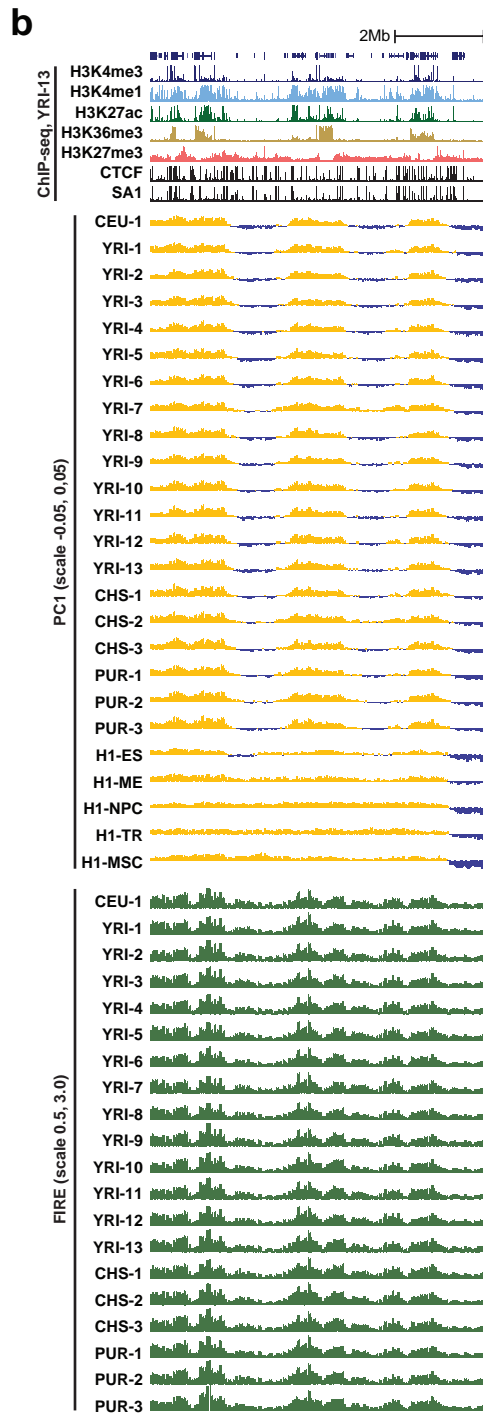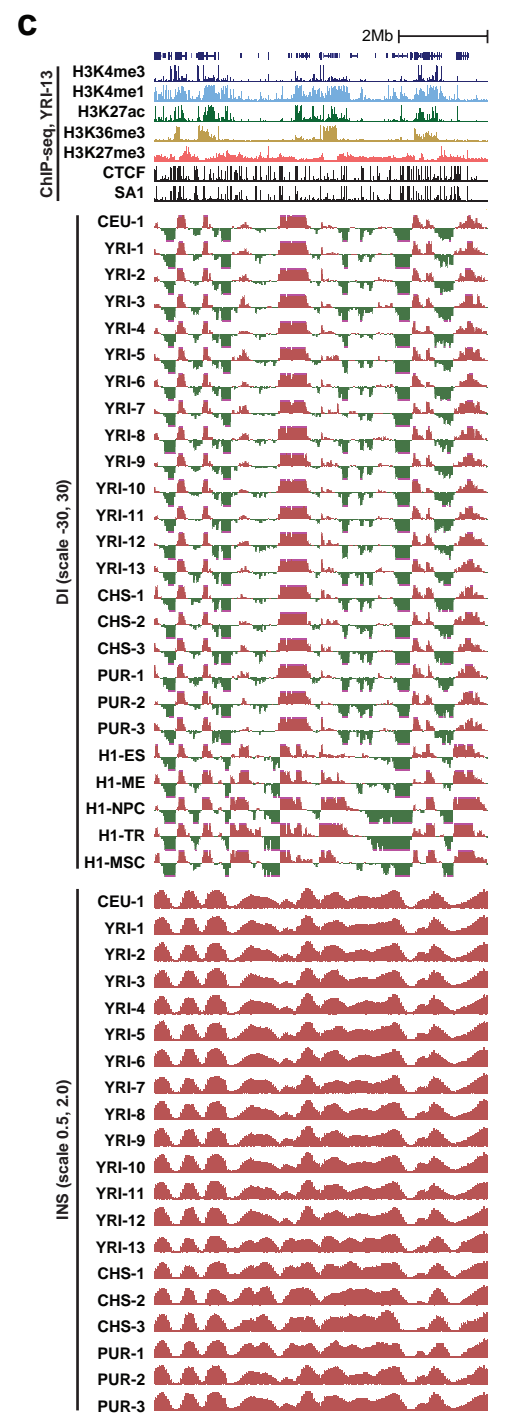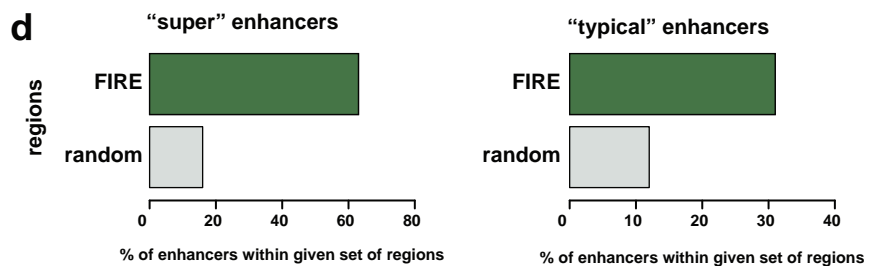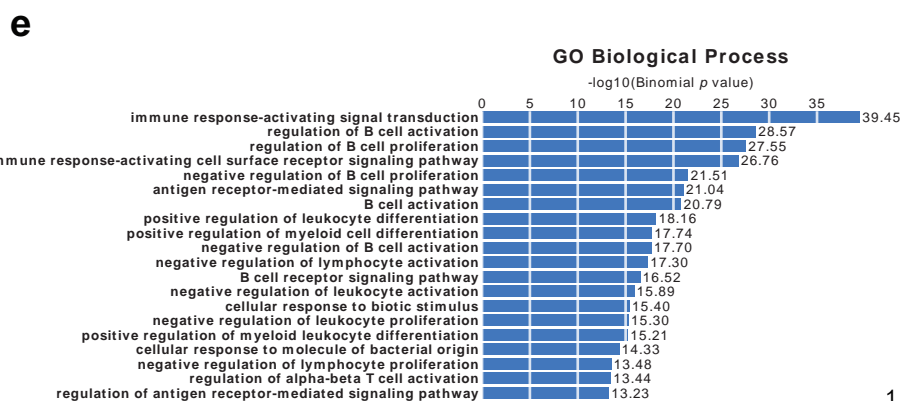

**Figure S1. Hi-C derived molecular phenotypes measured across 20 LCLs.** (a) Hi-C contact matrices show for all 20 LCLs. For comparison, we also show data from H1 human embryonic stem cells (H1-ES), and 4 lineages derived from H1 by *in vitro* differentiation<sup>1</sup> (H1-ME = Mesendodermal cells, H1-NPC = Neuronal precursor cells, H1-TR = Trophoblast-like cell, MSC = Mesenchymal stem cells). These H1-derived cell lines represent different cell types from the same individual (i.e. same genetic background). The region shown here is the same as Figure 1a (chr8:125,040,000-132,560,000; hg19). (b) Same region as in (a) but showing PC1 and FIRE values. CHIP-seq data for several histone modifications, CTCF, and Cohesin subunit SA1 are shown for one LCL (YRI-13, GM19240) as a reference for the epigenomic landscape<sup>2</sup>. (c) Same region as (a) but showing DI and INS values. (d) Bar plots show the percentage of super-enhancers (left) or typical enhancers (right) in GM12878<sup>3</sup> that overlap with 6,980 LCL FIRE bins (called as FIRE in at least one individual in our dataset) or 6,980 random 40kb bins. (e) Biological Process Gene Ontology terms associated with genes proximal to FIRE regions as defined by GREAT<sup>4</sup>.

a

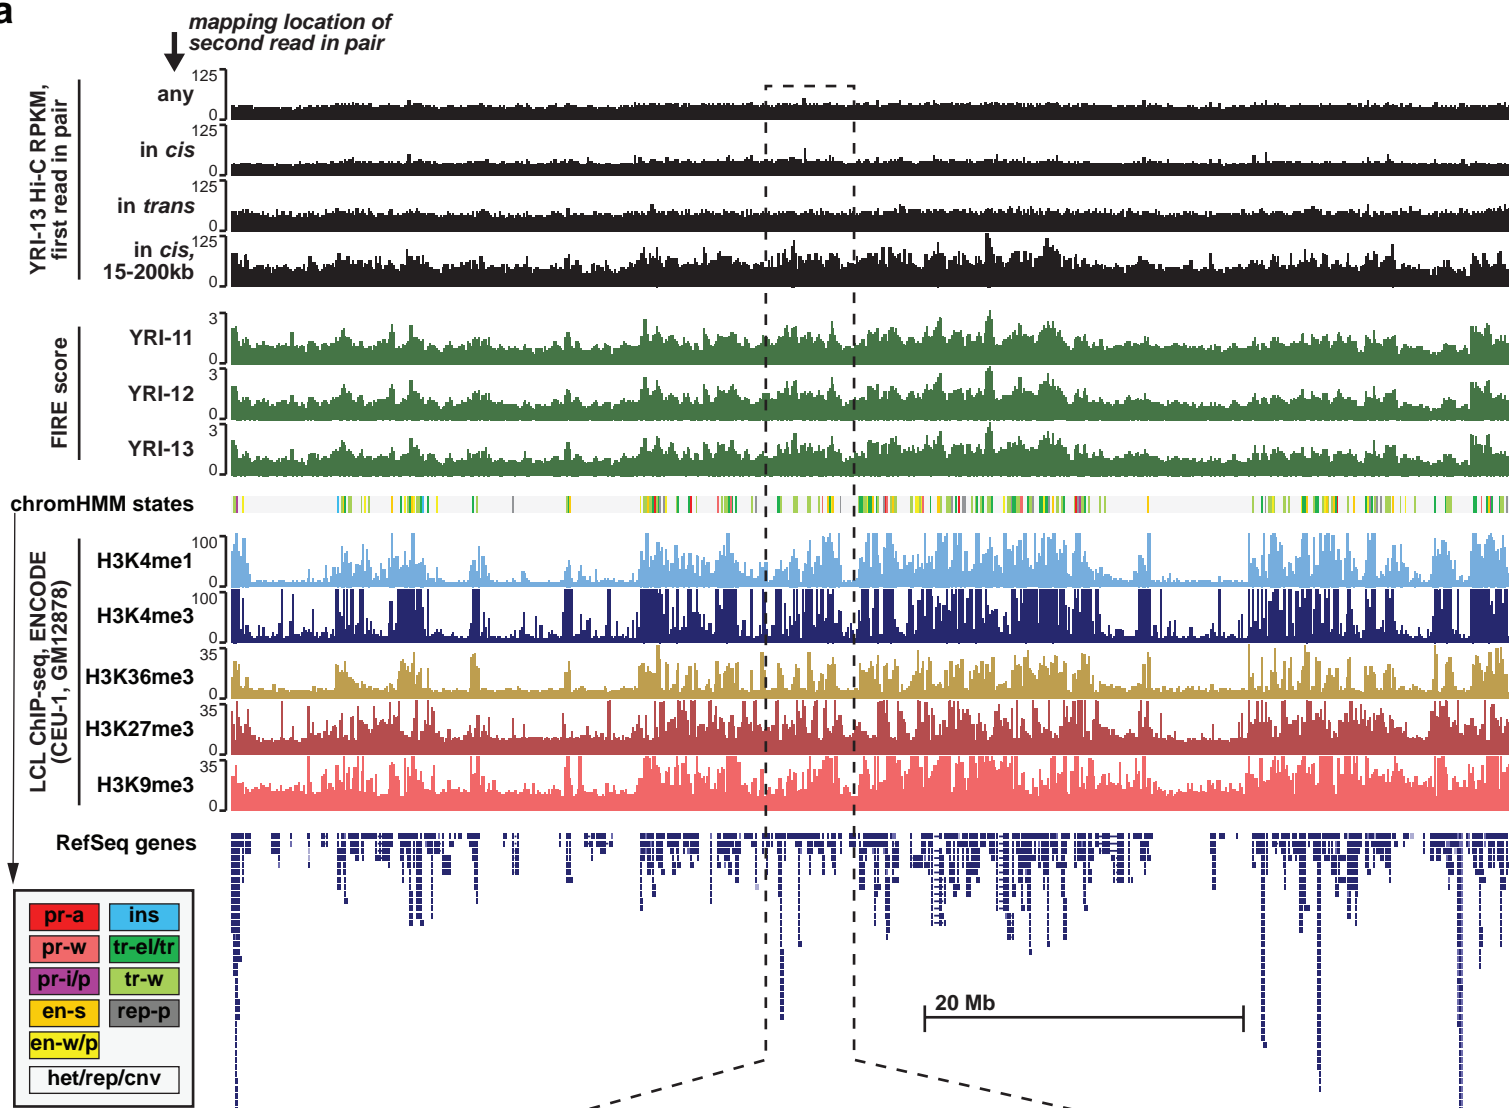

b

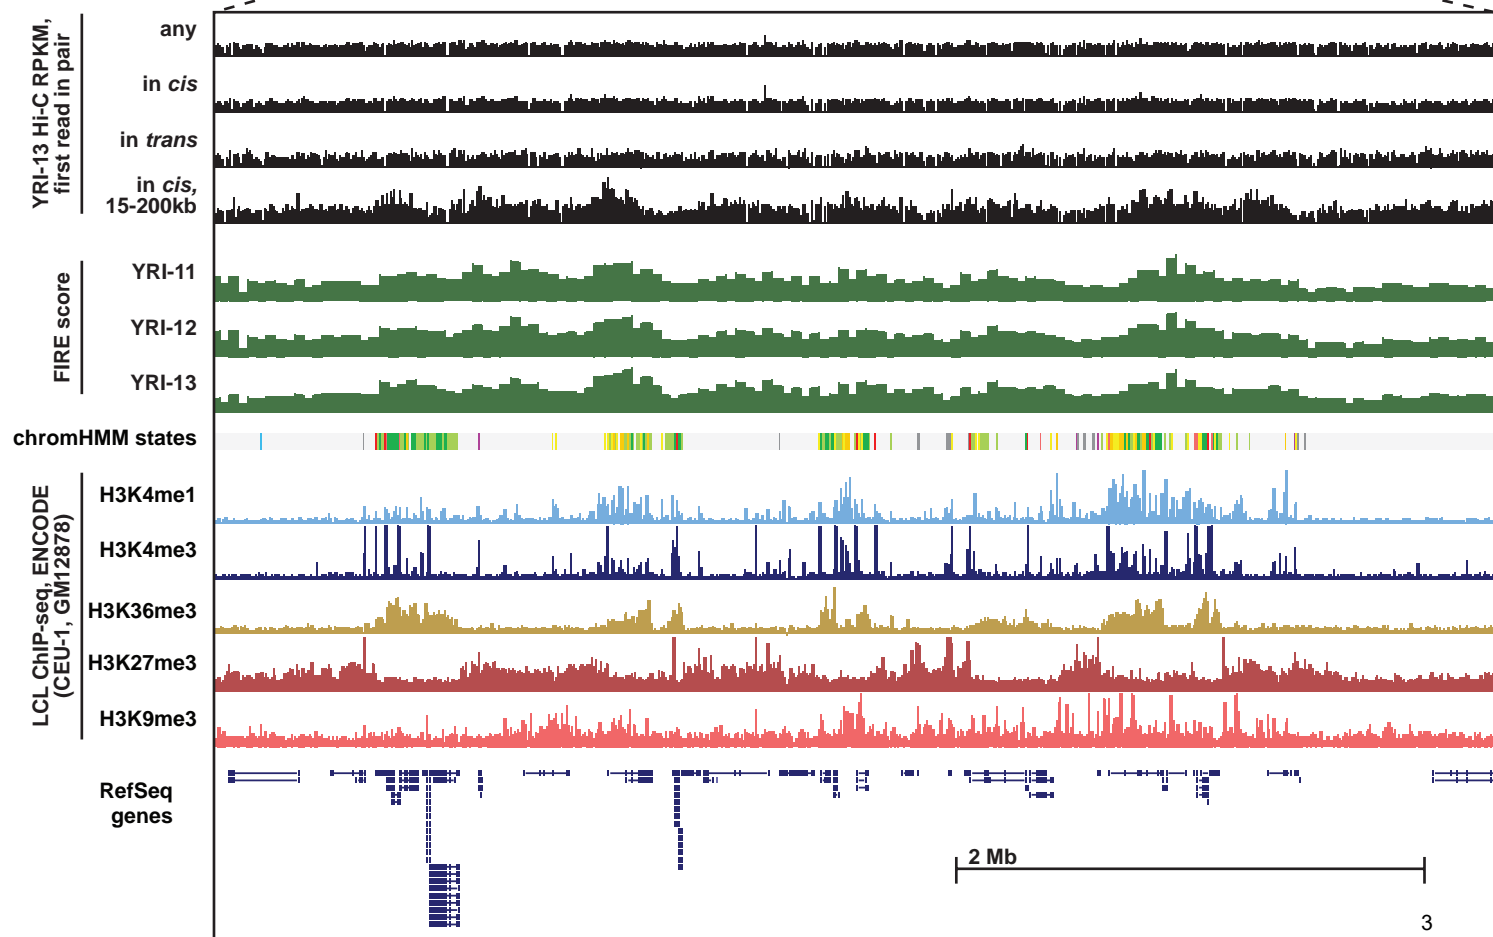

**Figure S2. FIRE measures density of local interactions.** Illustrative example showing that overall density of Hi-C reads (any read irrespective of location of interacting partner, all *cis* interactions, or all *trans* interactions) is highly consistent across the genome. However, interactions between partners separated by 15-200kb (“FIRE” distance) are enriched in regions of the genome with marks of regulatory and transcriptional activity (H3K4me1, H3K4me3, H3K36me3 from ENCODE for CEU-1 / GM12878 shown for reference)<sup>5</sup>. ChromHMM<sup>6</sup> functional annotations for CEU-1 / GM12878 are also shown. pr-a = active promoter, pr-w = weak promoter, pr-i/p = inactive/poised promoter, en-s = strong enhancer, en-w/p = weak/poised, ins = insulator, tr-el/tr = transcriptional elongation or transcriptional transition, tr-w = weak transcribed, rep-p = polycomb-repressed, het/rep/cnv = heterochromatin, low signal, repetitive, or copy number variation. Top panel (a) shows the long arm of chr14 (chr14:24,406,737-104,693,368; hg19). Bottom panel (b) is a zoomed-in view of the region boxed by dotted lines (chr14:58,000,000-63,500,000; hg19).

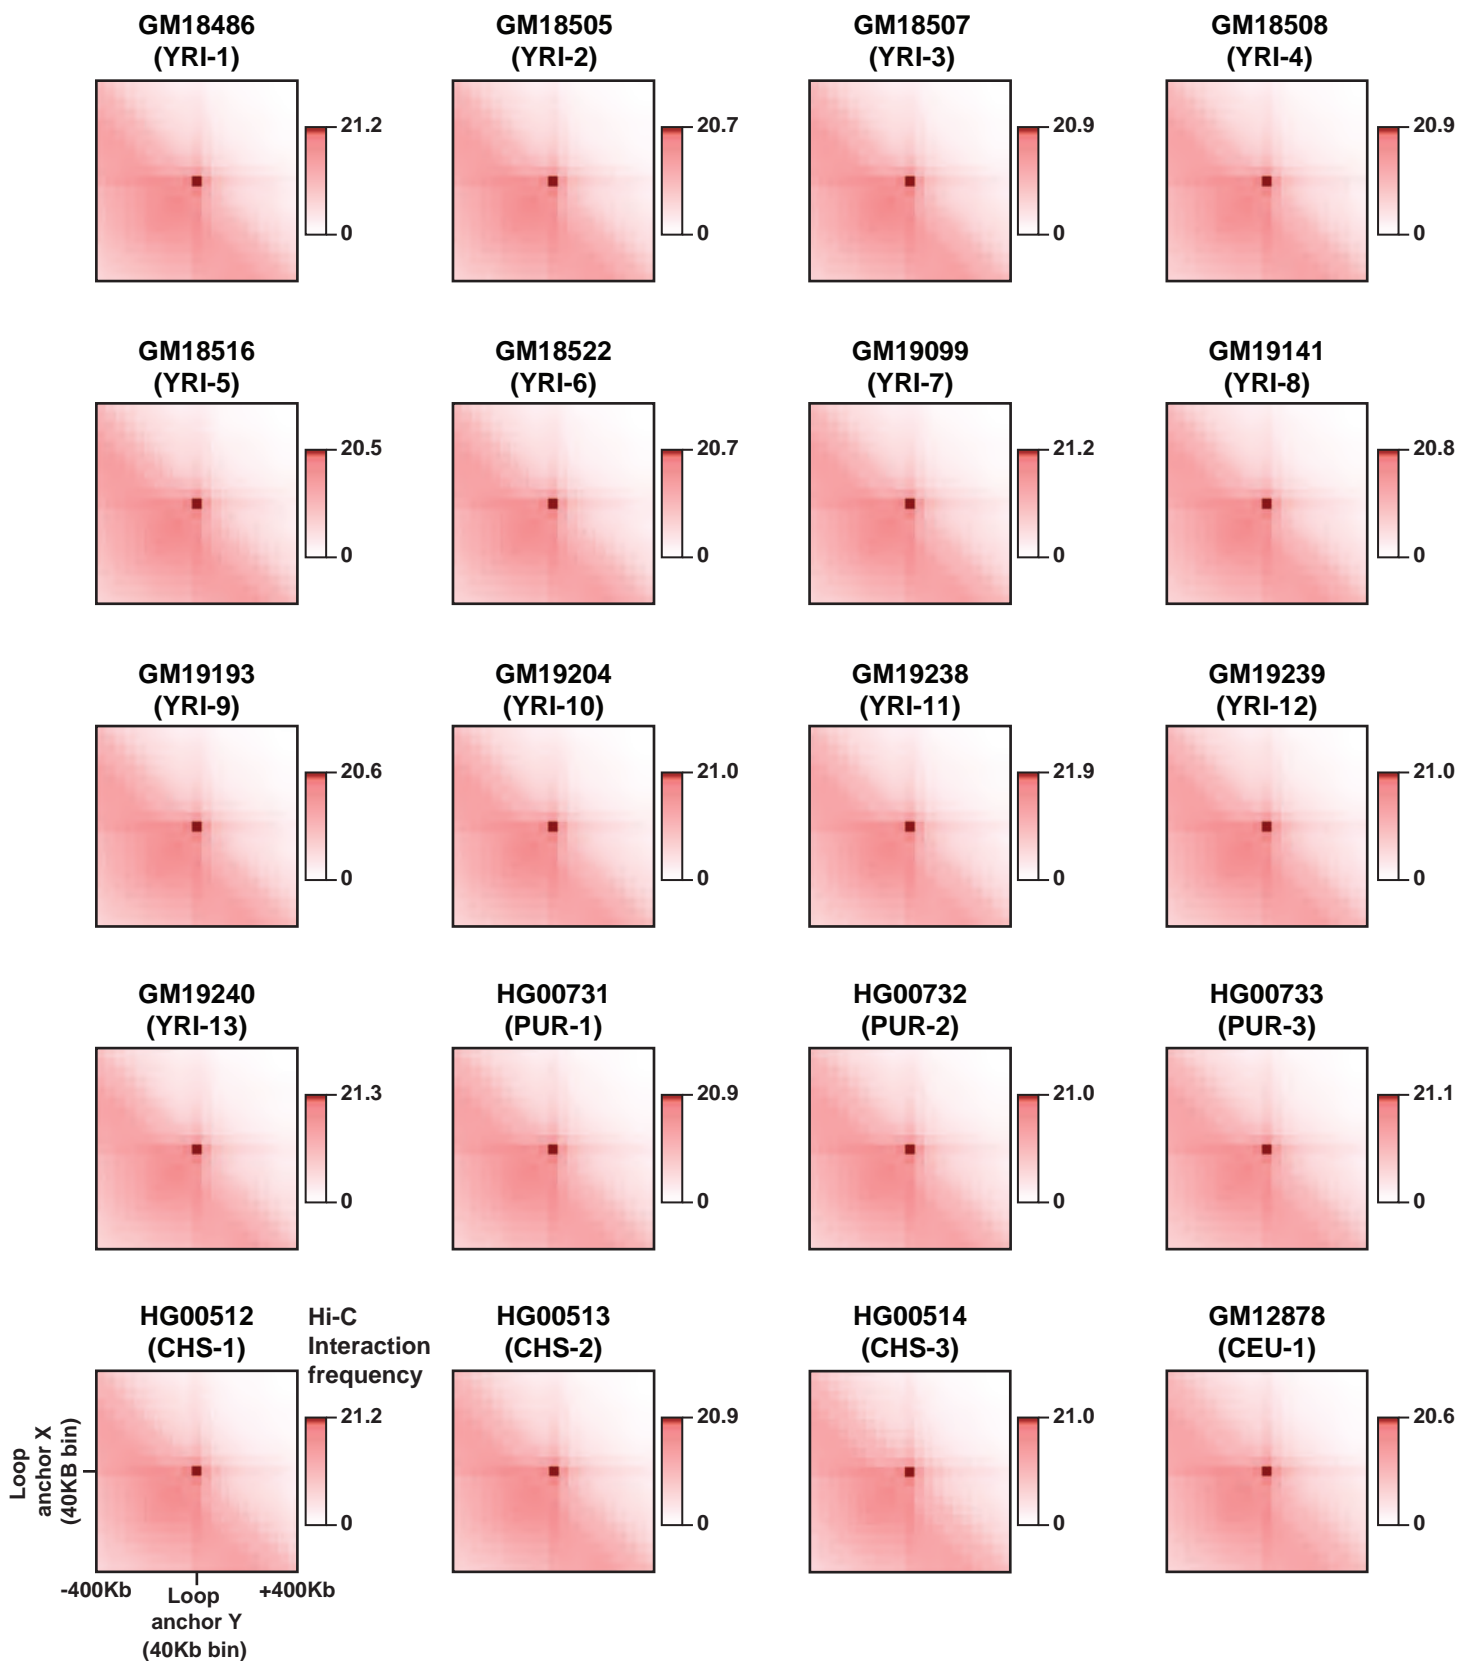

**Figure S3. Aggregate looping interactions in each sample.** Aggregate plots show the interaction frequencies at GM12878 HiCCUPS loops from Rao et al 2014 in each sample examined here. All autosomal *cis* loops with anchor bins separated by more than 40kb are included here (N=8,893). The middle bin represents the interaction frequency between two 40kb bins containing loop anchor bins. The full submatrix extends 10 bins (400kb) upstream and downstream of the interaction bin (x and y axis). The color scale indicates the average interaction frequency per loop from Hi-C contact matrices.

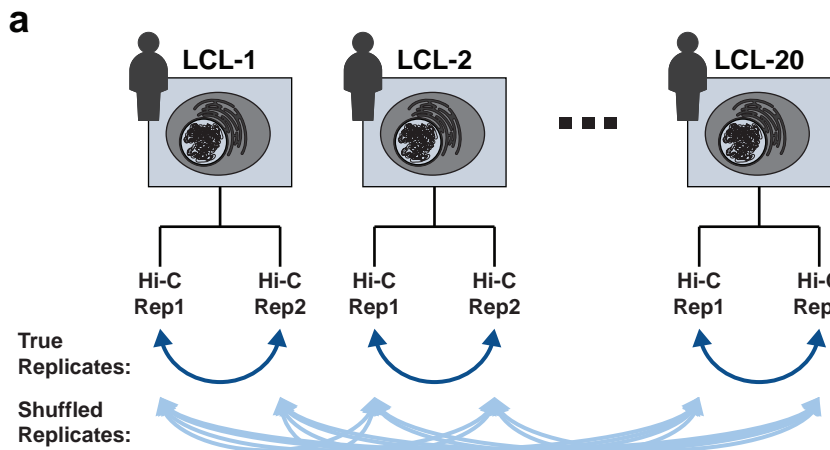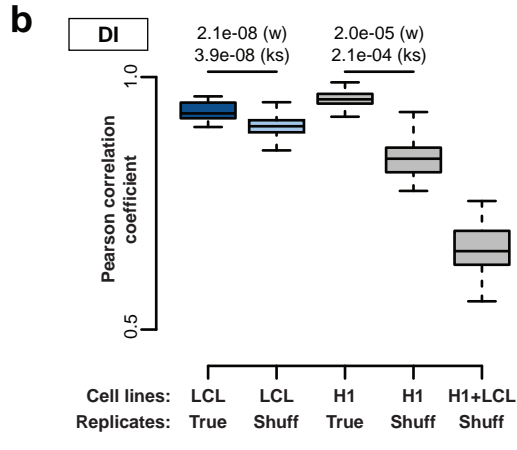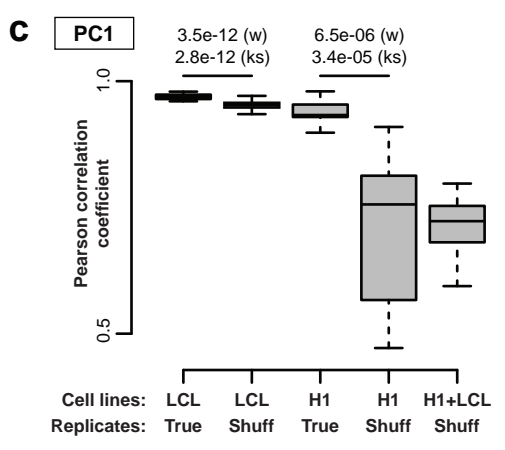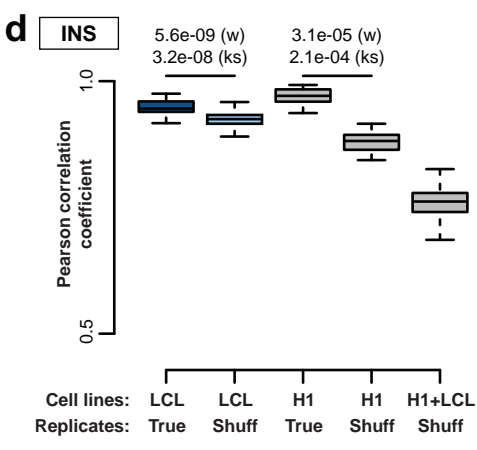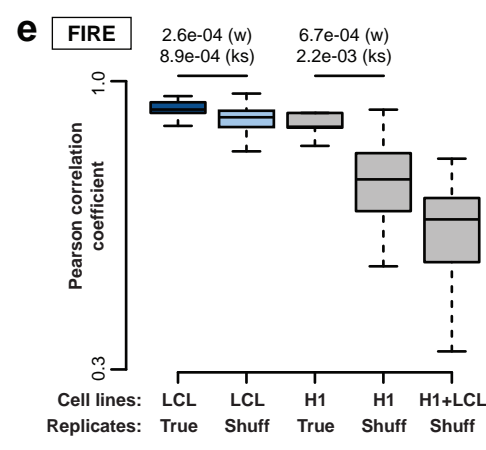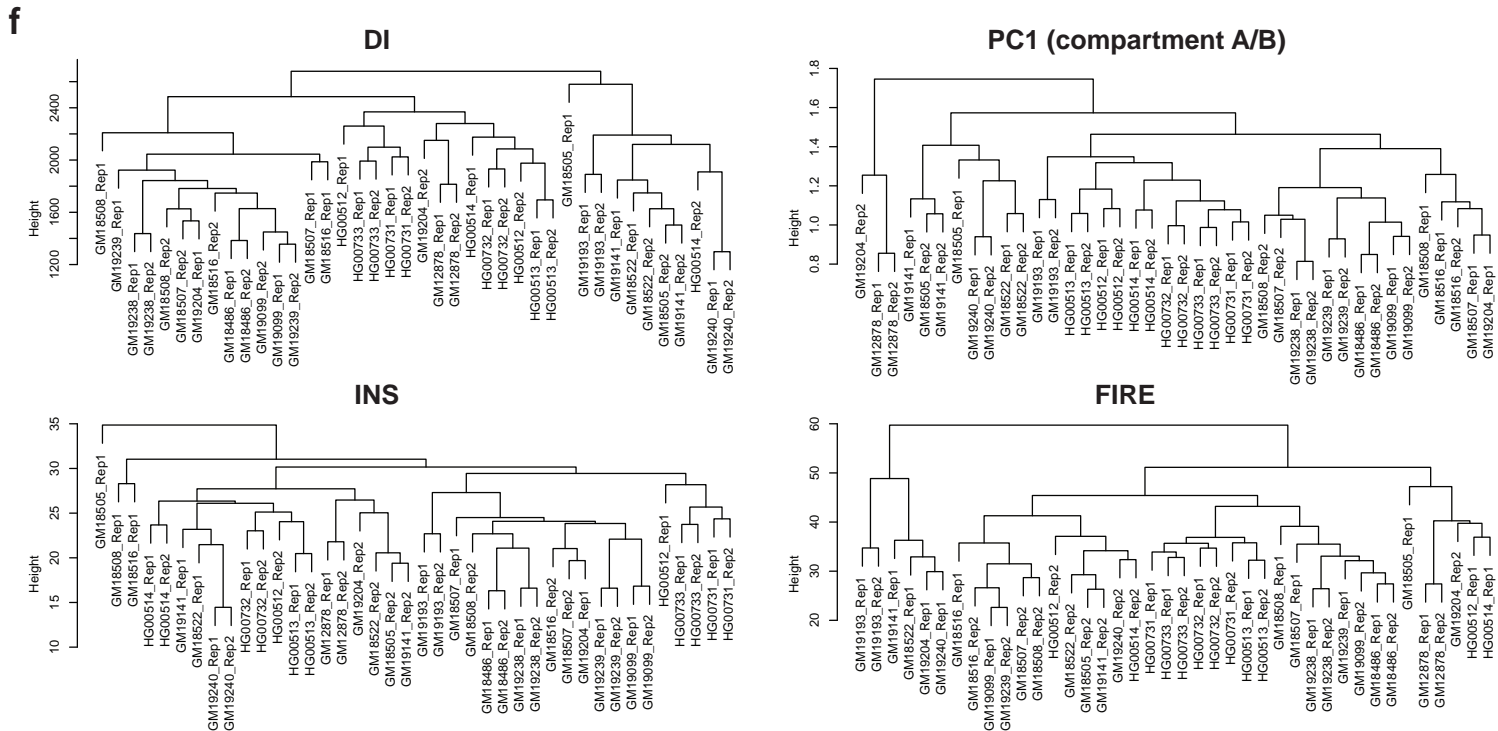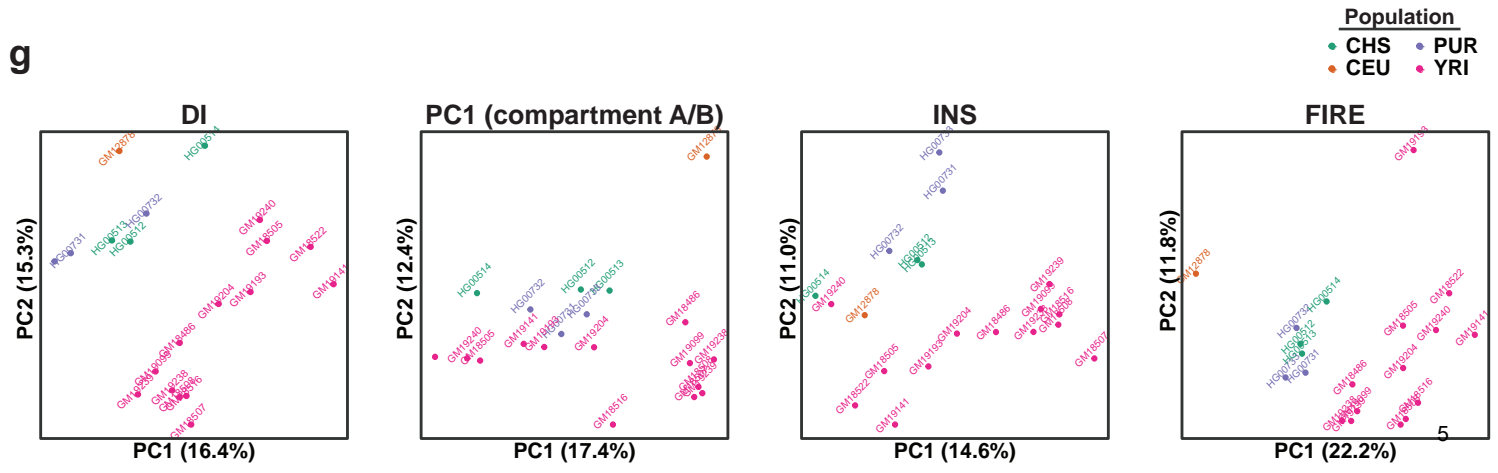

**Figure S4. 3D chromatin variation among 20 LCLs and H1-derived lineages.**

(a) Shuffling scheme used to assess biological variability in Figure 1b-d, and here in panels b-e. (b)-(e) Boxplots show Pearson correlation coefficient between biological replicates from the same cell line (Replicates = "True"), and between replicates from different cell lines (Replicates = "Shuff"; short for "shuffled"). The set of cell lines considered is indicated below each box. LCL = 20 LCL cell lines (40 replicates); H1 = H1-ES and the four derived lineages H1-ME, H1-NPC, H1-TB, H1-MS (5 cell lines, 10 replicates); H1+LCL = 20 LCLs and 5 H1-derived lines considered together (50 replicates). All phenotypes examined here (DI, PC1, INS, or FIRE) show a signature of cell-type specificity whereby they are more similar across individuals when looking at the same cell type (i.e. LCLs), relative to comparing across cell types within an individual (i.e. same genetic background, H1s). Statistical significance calculated by two-sided Wilcoxon rank sum test (labeled w), or Kolmogorov–Smirnov test (labeled ks). (f) Dendrograms from hierarchical clustering of 40 Hi-C replicates based on the Hi-C-derived phenotype indicated above each dendrogram (DI, PC1, INS, or FIRE). In most cases, replicates from the same cell lines cluster together. (g) Principal Component Analysis of 20 LCLs using one of four Hi-C-derived phenotypes, as indicated above each plot. Each population in our study is represented by a different color as indicated in the color key to the right.

**a**

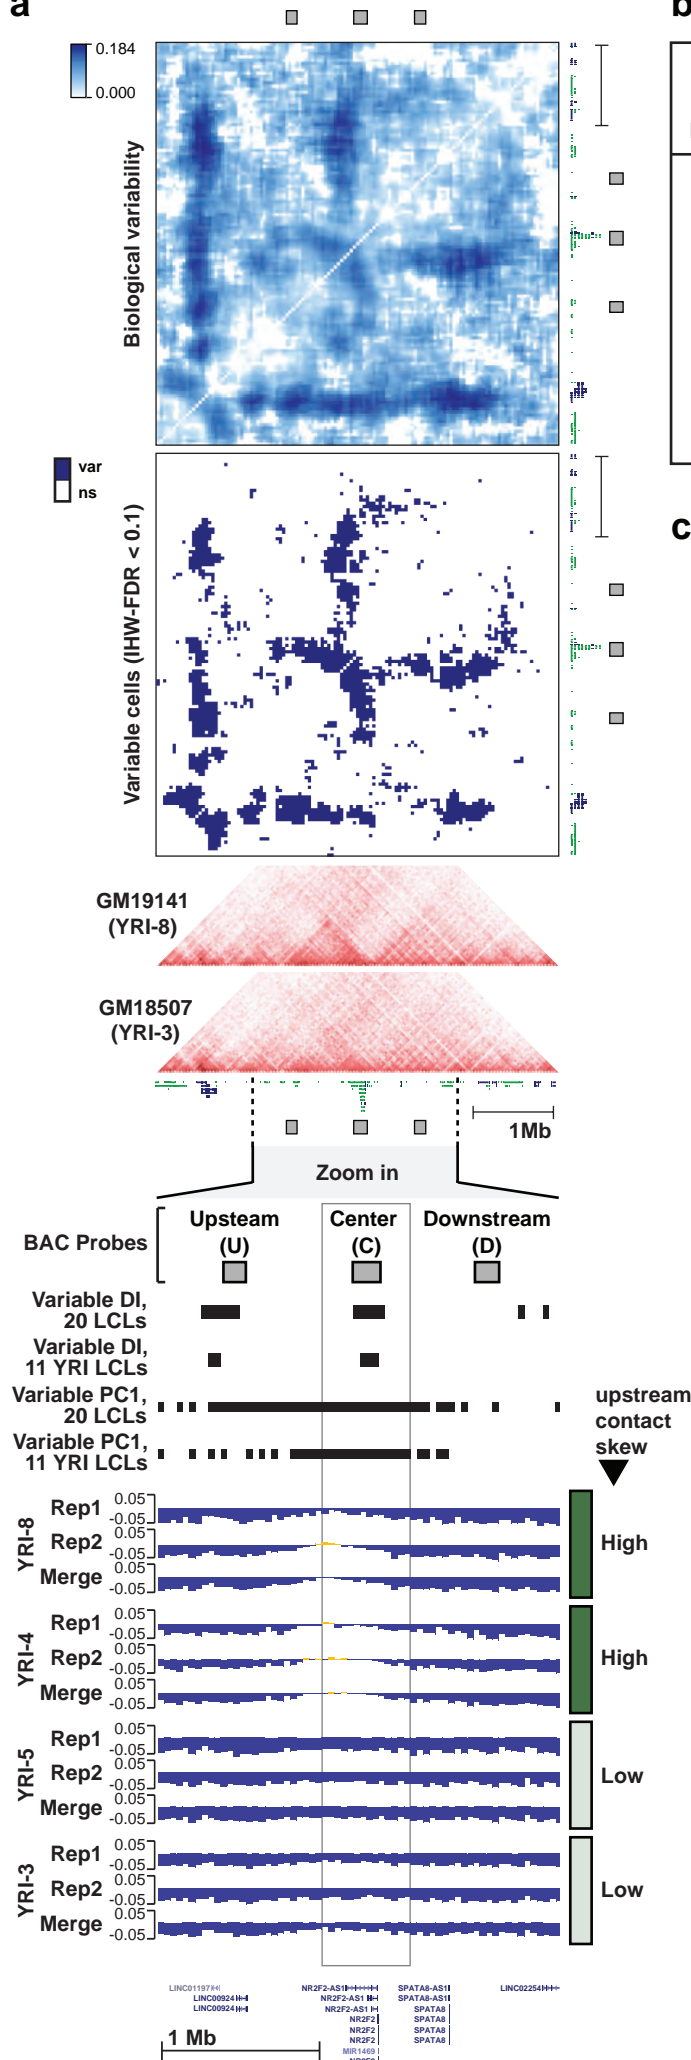

**b**

| Metric | discovery set | testable bins | variable bins (limma FDR<0.1) | merged regions | empirical false positives (avg 1K permutations) | empirical FDR |
|--------|---------------|---------------|-------------------------------|----------------|-------------------------------------------------|---------------|
| DI     | 20 LCLs       | 17,178        | 3,424                         | 2,318          | 59.6                                            | 5.49%         |
| DI     | 11 YRI LCLs   | 16,605        | 1,086                         | 818            | 13.6                                            | 0.40%         |
| FIRE   | 20 LCLs       | 7,276         | 3,219                         | 1,993          | 29.2                                            | 8.92%         |
| FIRE   | 11 YRI LCLs   | 6,321         | 327                           | 255            | 24.3                                            | 0.75%         |
| INS    | 20 LCLs       | 15,387        | 6,661                         | 2,485          | 47.3                                            | 1.93%         |
| INS    | 11 YRI LCLs   | 14,319        | 2,447                         | 1,033          | 7.9                                             | 0.12%         |
| PC1    | 20 LCLs       | 52,328        | 19,128                        | 7,732          | 150.6                                           | 2.22%         |
| PC1    | 11 YRI LCLs   | 52,430        | 6,777                         | 3,360          | 24.2                                            | 0.13%         |

**c**

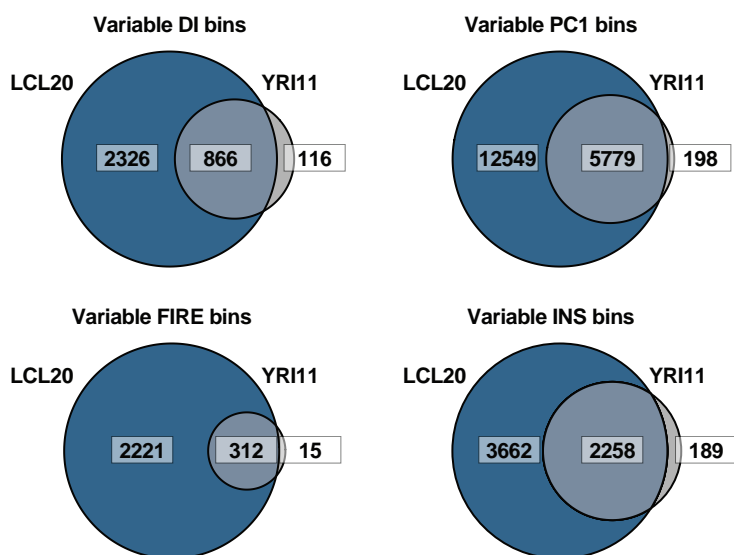

**d**

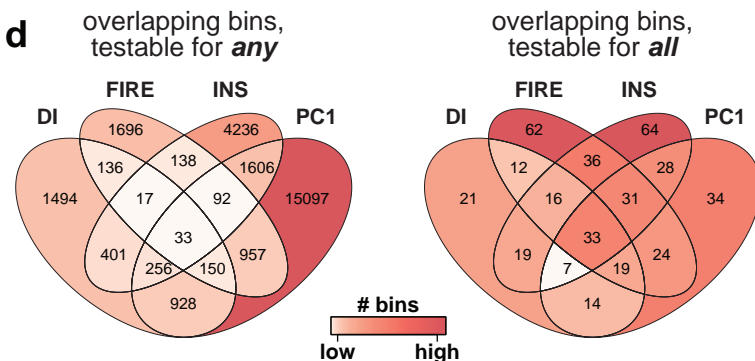



**Figure S5. Characterization of variable regions of 3D chromatin conformation.** (a) Same region as in Figure 2a (chr15:94,280,000-99,280,000), but showing reproducible variation in PC1, and full square matrices for contact matrix variability as opposed to the half-matrices shown in 2a. FISH probes used in Figure 2 are represented as grey boxes to the top and right of square heatmaps. (b) Similar to Figure 2b, but with additional data columns. The “merged regions” column shows the number of regions after merging variable bins that are immediately adjacent to each other. The empirical false positives and FDR columns show the number and percentage of false positive variable regions detected in 1,000 permutations with shuffled labels. (c) Venn diagrams showing the overlap of variable regions identified using either all 20 LCLs (“LCL20”) or only the 11 unrelated YRI LCLs (“YRI11”). Only bins tested for both LCL20 and YRI11 are included here. (d) Venn diagrams showing the number of variable bins for each phenotype or combination of phenotypes. The diagram on the left includes bins that were tested for at least one of the four phenotypes. The diagram on the right only includes bins that were tested for all four phenotypes.

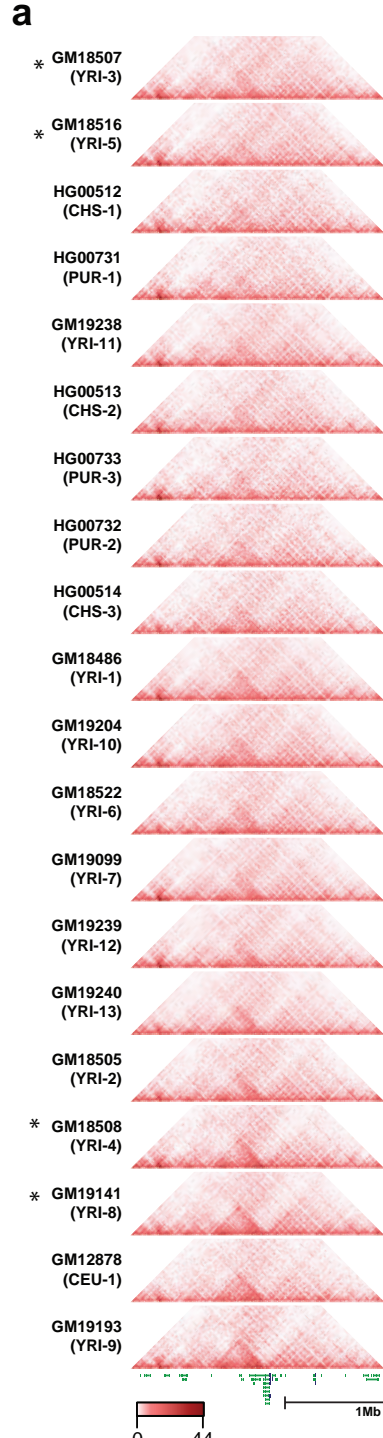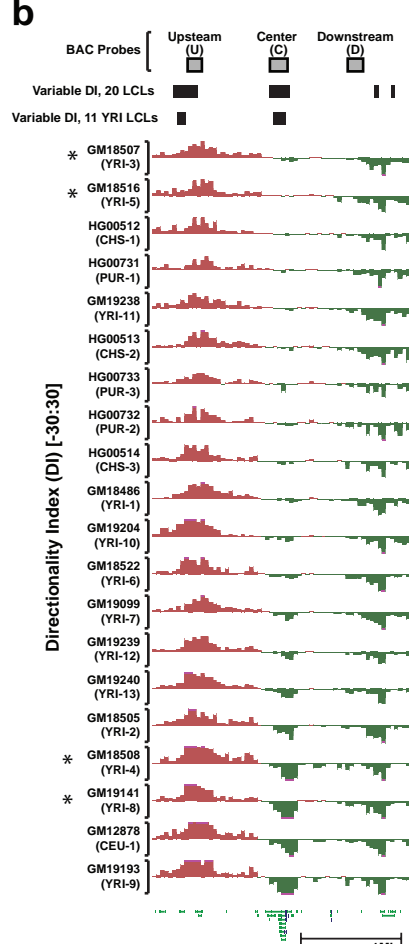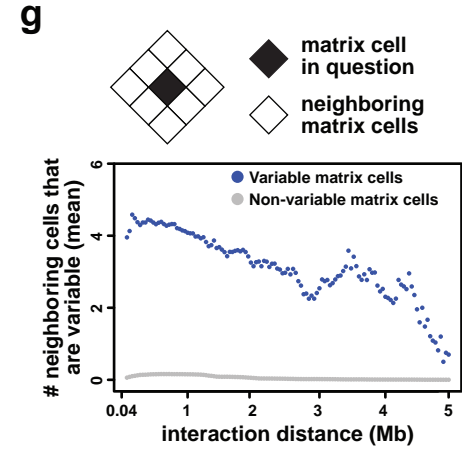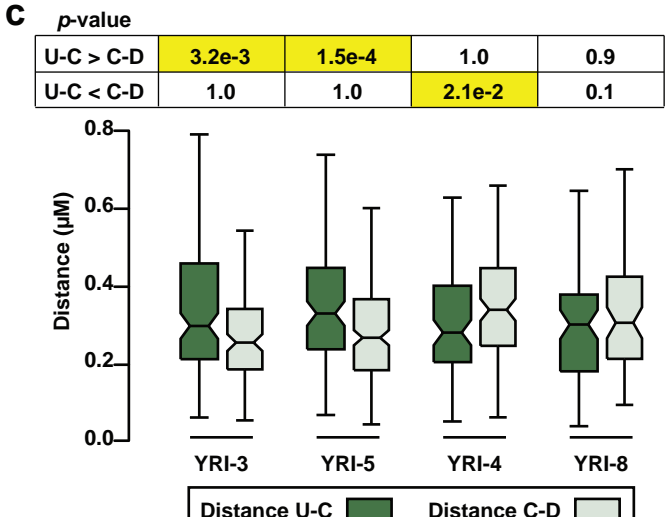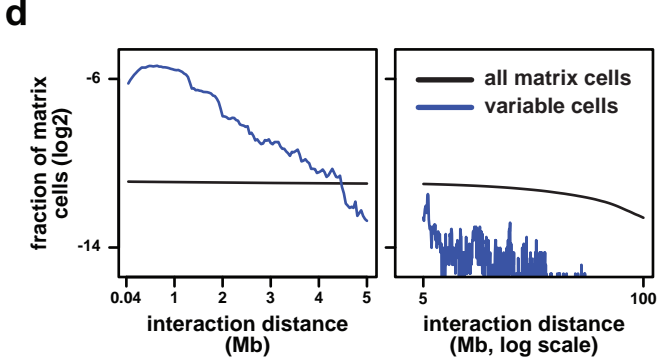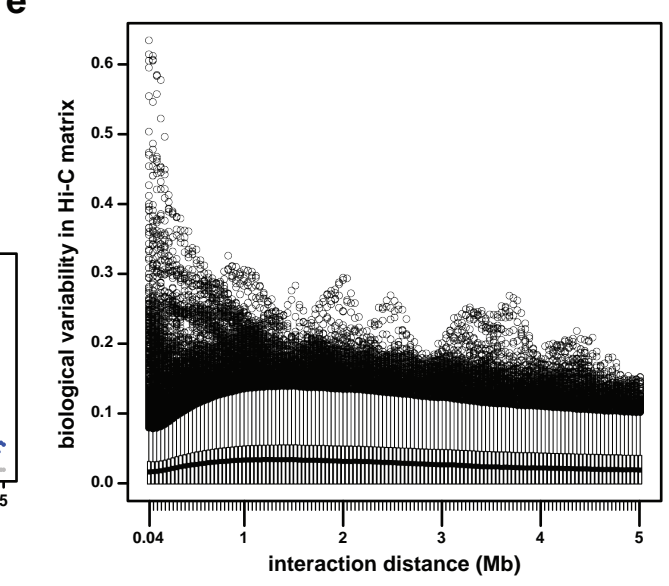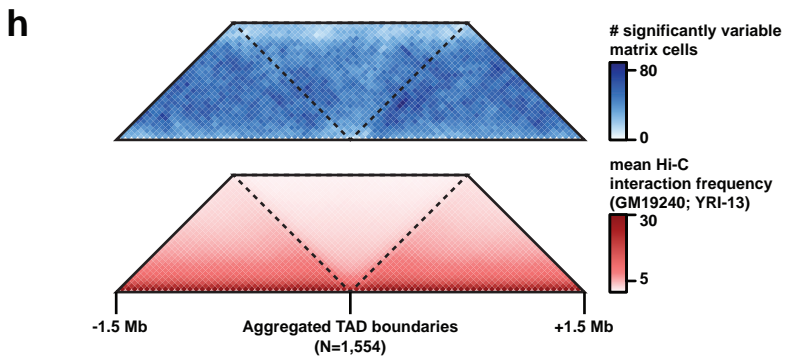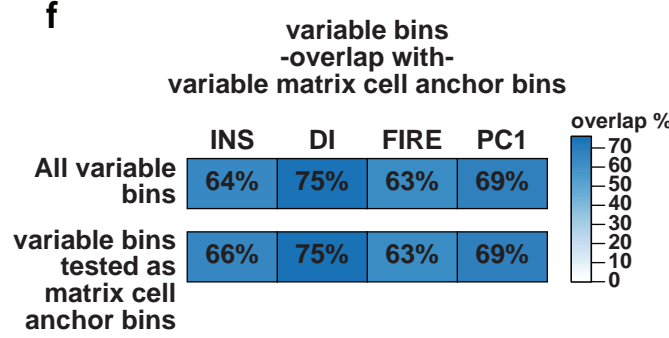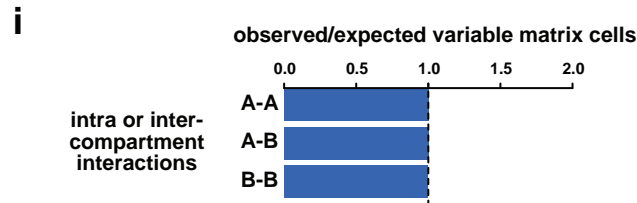

**Figure S6. Additional characterization of variable regions of 3D chromatin conformation.** (a-b) Same region as Figure 2a but showing Hi-C data (a) or DI (b) for all 20 LCLs ordered by the degree of upstream contact bias in the middle region. (c) Same underlying FISH data as in Figure 2e, but here comparing the distance between U and C probes to the distance between C and D probes within the same LCL. *p*-values calculated by one-sided Wilcoxon rank sum test. (d) As in Figure 2d, blue line shows the fraction of variable matrix cells distributed across a range of interaction distances. Black line shows the fraction of all matrix cells distributed across the same range of interaction distances. (e) Boxplots show average biological variability for matrix cells separated by distances as indicated on the X axis (40Kb – 5Mb in 40Kb increments). Outliers show as open circles above boxplots. (f) The fraction of variable INS/DI/FIRE/PC1 bins that overlap variable matrix cell anchor bins. (g) Clustering of variable matrix cells as a function of contact distance (40Kb – 5Mb in 40Kb increments). Blue dots show values for variable matrix cells. Grey dots show values for non-variable matrix cells (i.e. matrix cells in which we did not detect significant biological variability among our samples). (h) Bottom triangle shows the average Hi-C contact frequency at LCL TAD boundaries (from GM12878) and adjacent regions. Top triangle plot shows the number of variable matrix cells identified at the indicated positions relative to these TAD boundaries. (i) The ratio of observed to expected variable matrix cells among contacts between regions the same compartment (A-A or B-B) or in different compartments (A-B). Expected values were derived from the total number of matrix cells in each category.

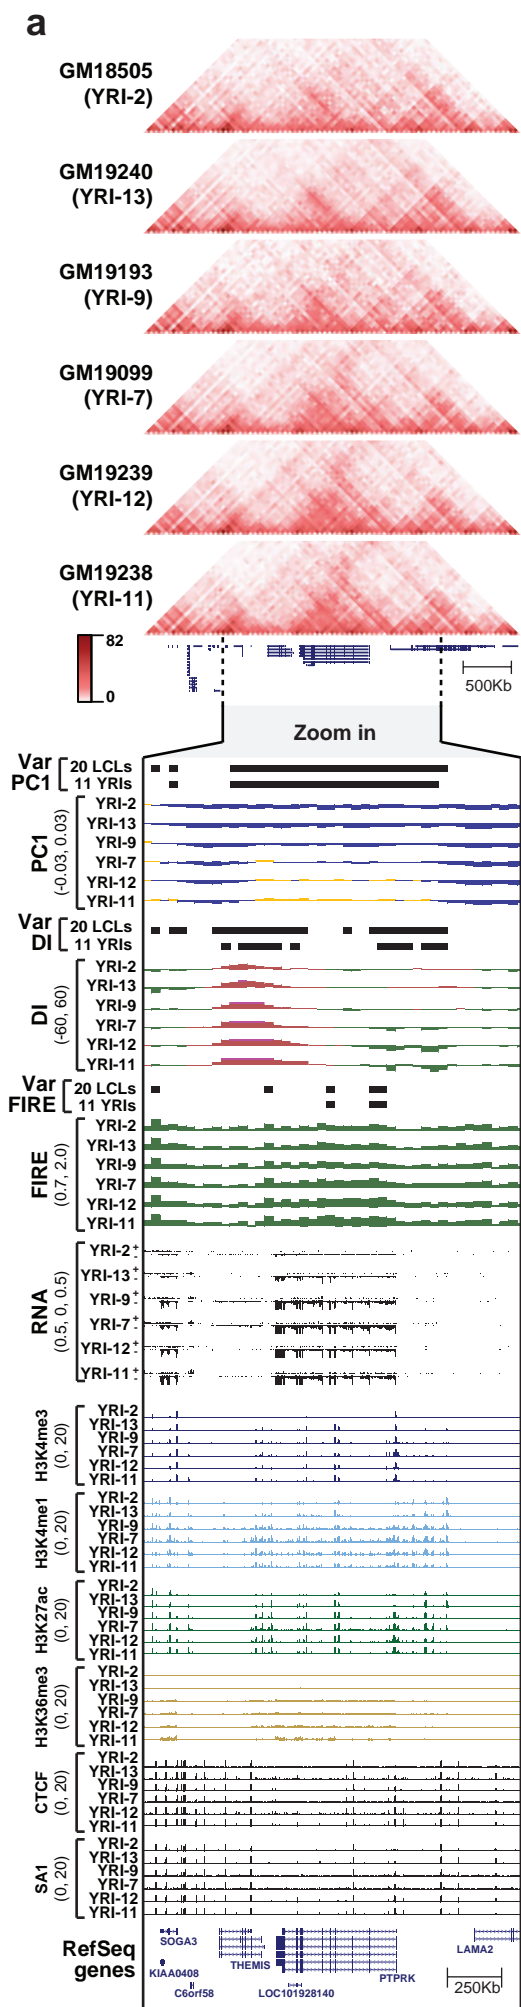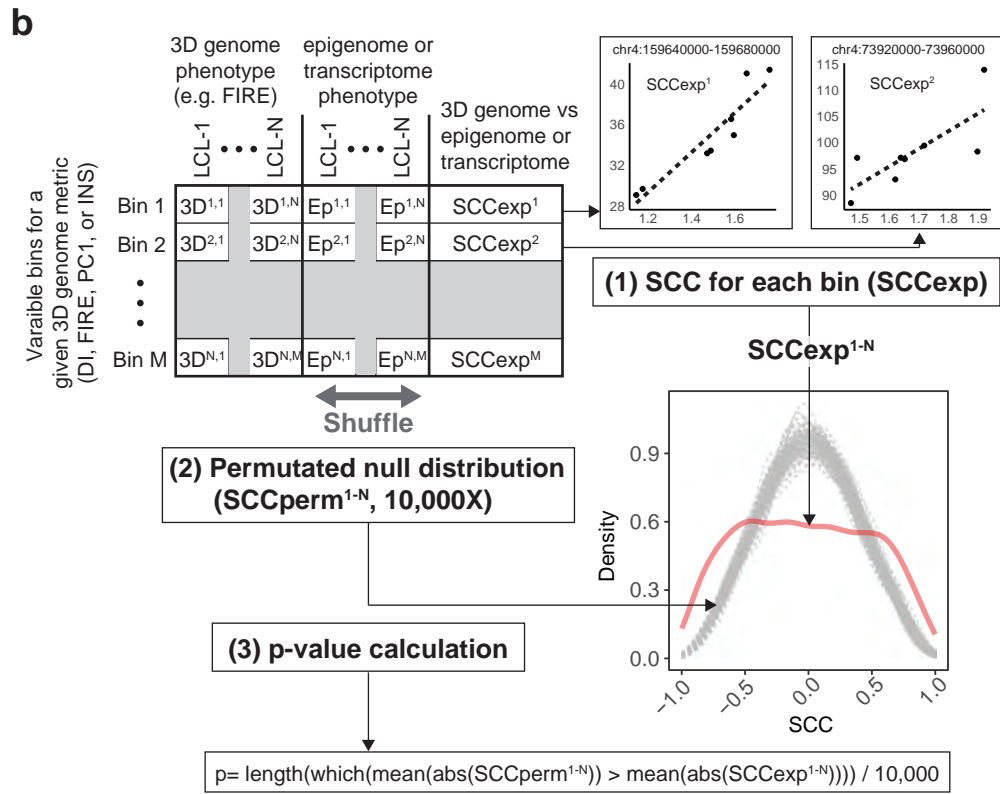

**Figure S7. Coordinated variation between 3D chromatin conformation and multiple molecular phenotypes.** (a) Same region as in Figure 3a (chr6:126,280,000-131,280,000; hg19), but showing additional individuals and additional data types as indicated. (b) Representation of permutation scheme used to calculate  $p$ -values in Figure 3b and Supplemental Figure 8.  $p$ -values are calculated as the number of permutations with a mean absolute SCC greater than the observed values.



**Figure S8. Correlations between 3D genome phenotypes and other molecular phenotypes.** Five subpanels show results for different types of variable regions: PC1, DI, INS, FIRE, contact matrix anchor bins (top to bottom). Density plots show the distribution of Spearman correlation coefficients (SCC) between 3D phenotype indicated to the left of each subpanel and molecular phenotypes as indicated above each plot. See Supplemental Figure 7b for schematic of calculations. Each subpanel is further organized into three columns as indicated at the top of the Figure: (left column) The ChIP-seq and RNA-seq data in this column are from Kasowski *et al*, 2013<sup>2</sup>. These data are the same as in Figure 3b, with the addition of histone modifications H3K4me1, H3K4me3, and H3K36me3, as well as DNase-seq data from Degner *et al*, 2012<sup>7</sup>. Plots include all individuals for which both Hi-C and the data type in question are available (N=8 individuals for ChIP-seq, N=7 for RNA-seq, and N=11 for DNase-seq). (middle column) SCC values with same ChIP-seq data as left column, but using a separate set of variable regions called in only 11 YRI individuals. We did not make these plots for variable contact matrix bins because there is only one variable bin call set. (right column) SCC using ChIP-seq data from McVicker *et al*, 2012<sup>8</sup>. These plots include N=10 individuals for which ChIP-seq and Hi-C data are available.

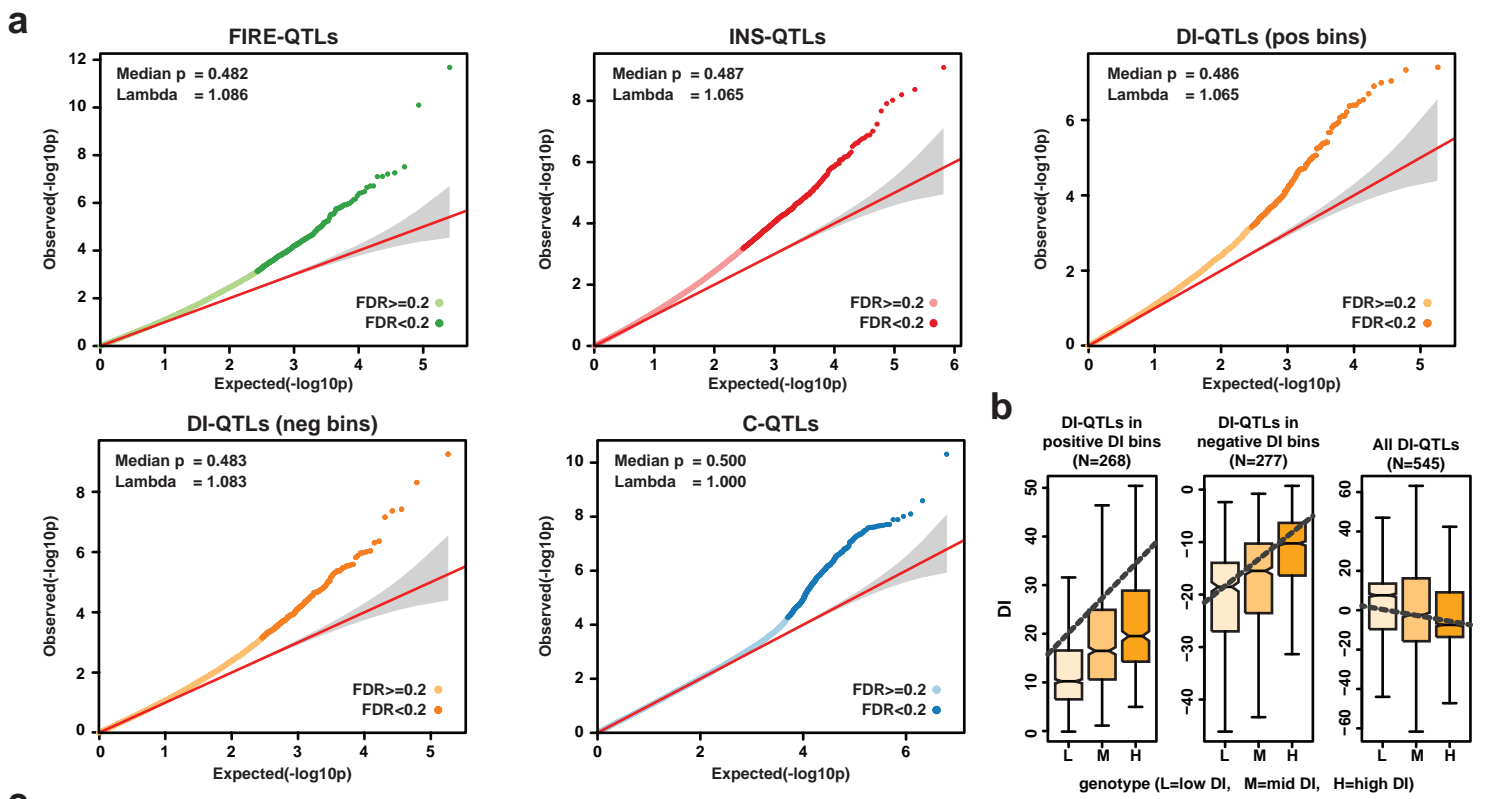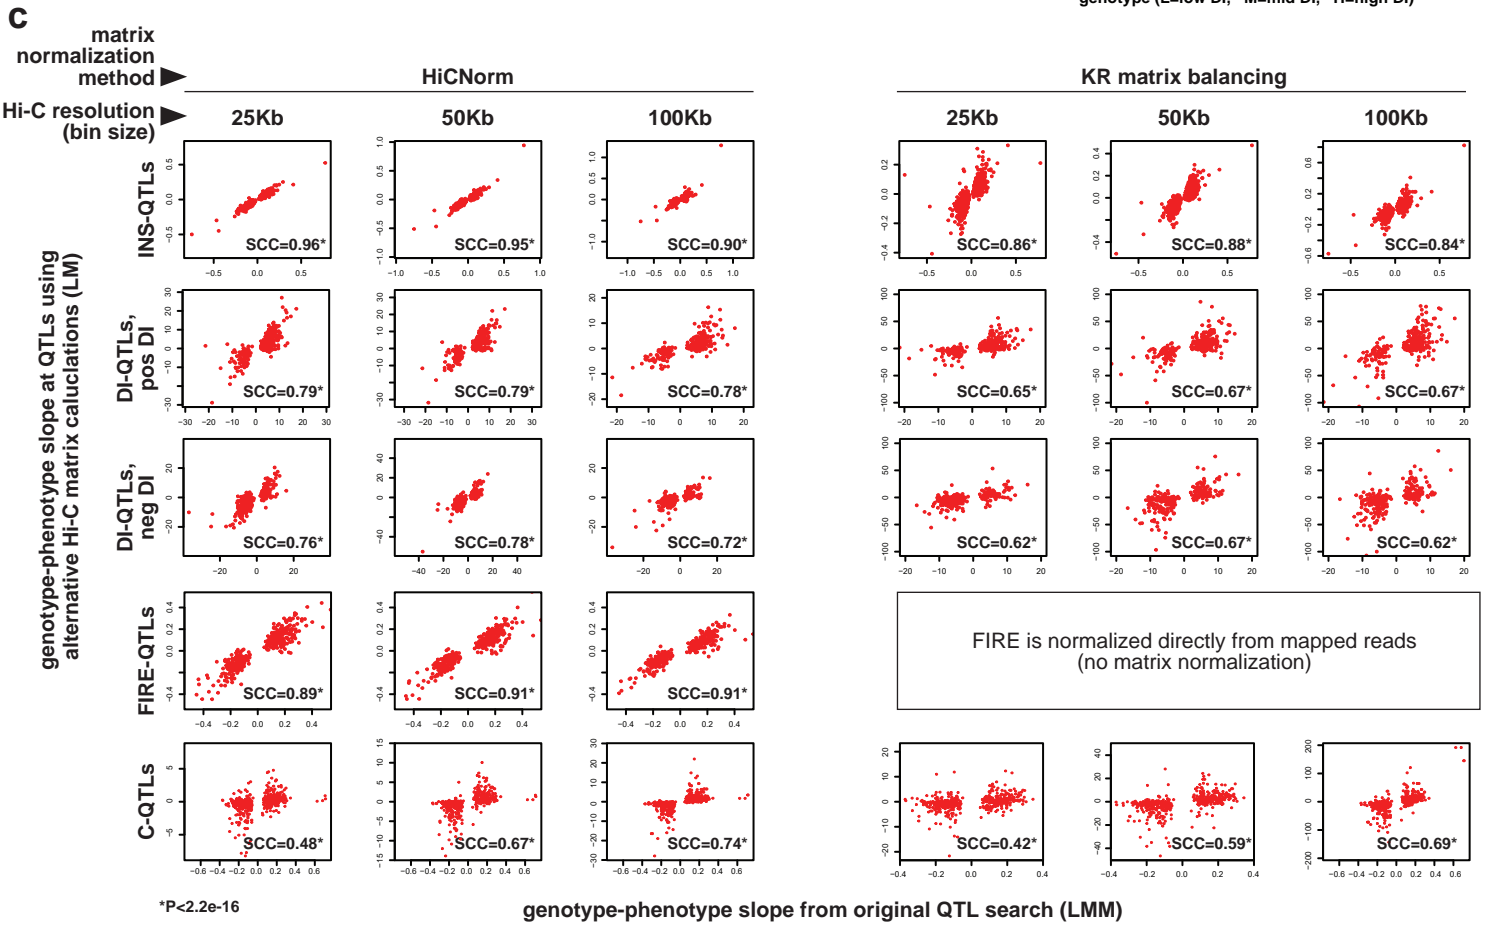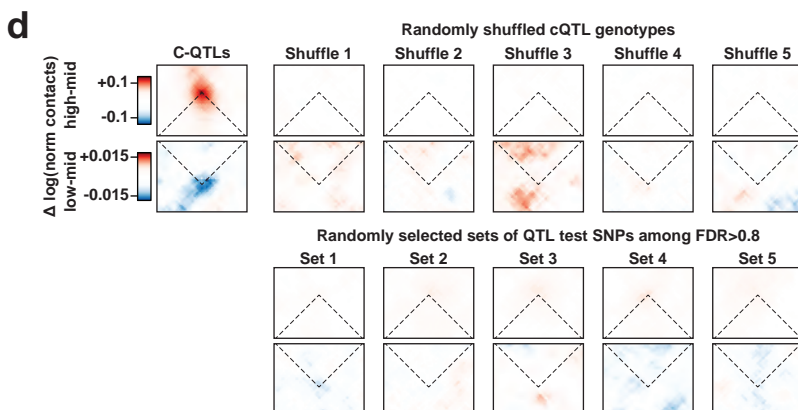

**e** Overlap between QTL sets

|           |      | QTL set A |     |      |     |  |
|-----------|------|-----------|-----|------|-----|--|
|           |      | DI        | INS | FIRE | C   |  |
| QTL set B | DI   | 545       | 0   | 4    | 0   |  |
|           | INS  |           | 911 | 1    | 0   |  |
|           | FIRE |           |     | 387  | 5   |  |
|           | C    |           |     |      | 345 |  |

**Figure S9. 3D chromatin QTLs.** (a) QQ plots for each QTL search. In each QQ plot, the X-axis is the  $-\log_{10}$  theoretical quantiles calculated from the uniform distribution. The Y-axis is the  $-\log_{10}$   $p$ -value calculated from linear mixed effects model for each type of QTL search. The grey area represents the 5% - 95% confidence bands based on Beta distribution  $\text{Beta}(i, M-i+1)$ , where  $i$  is the  $i$ -th order statistics and  $M$  is the total number of tested SNPs. (b) DI values by genotype for bins with positive DI (left), negative DI (right), and all QTLs (right). A Simpson's paradox is observed when all bins are considered together. (c) Genotype-phenotype relationship at QTLs using Hi-C data binned at different resolutions (25Kb, 50Kb, 100Kb), and normalized with different methods (HiCNorm, Knight-Ruiz matrix balancing). X axes represent beta values from the original QTL search. Y axes represent beta value from a linear model fit to the genotype-phenotype relationship using Hi-C data of the indicated resolution and normalization method. (d) Aggregate contact plots as in Figure 4f, but including several negative control sets. Top row shows C-QTL SNPs with 5 random shuffles of the genotypes. Bottom row shows 5 random sets of non-QTL SNPs selected from the opposite end of the FDR spectrum from actual C-QTLs ( $\text{FDR} > 0.8$ ). (e) Number of direct overlaps between QTL sets.



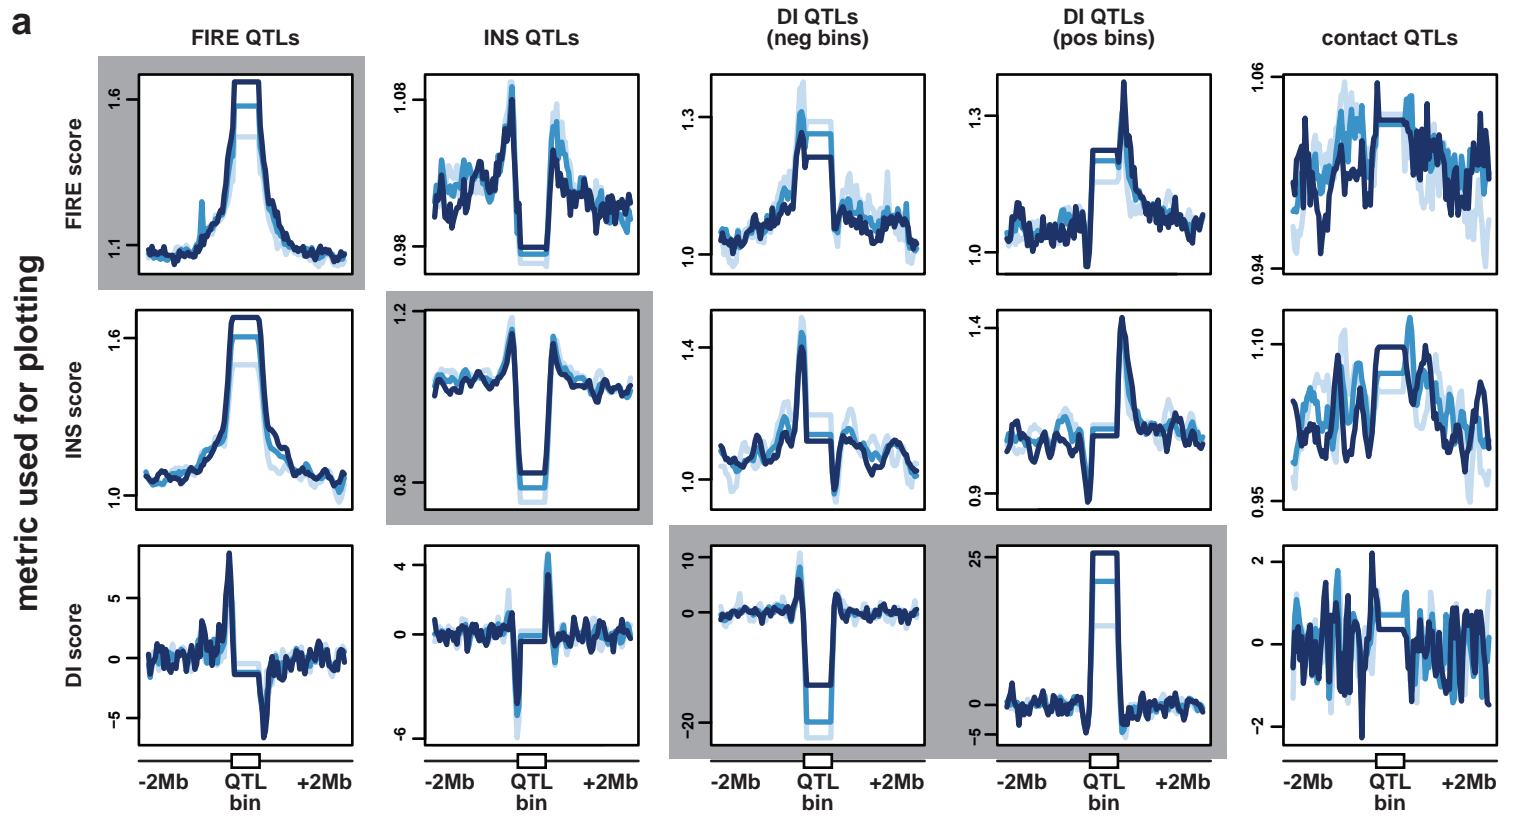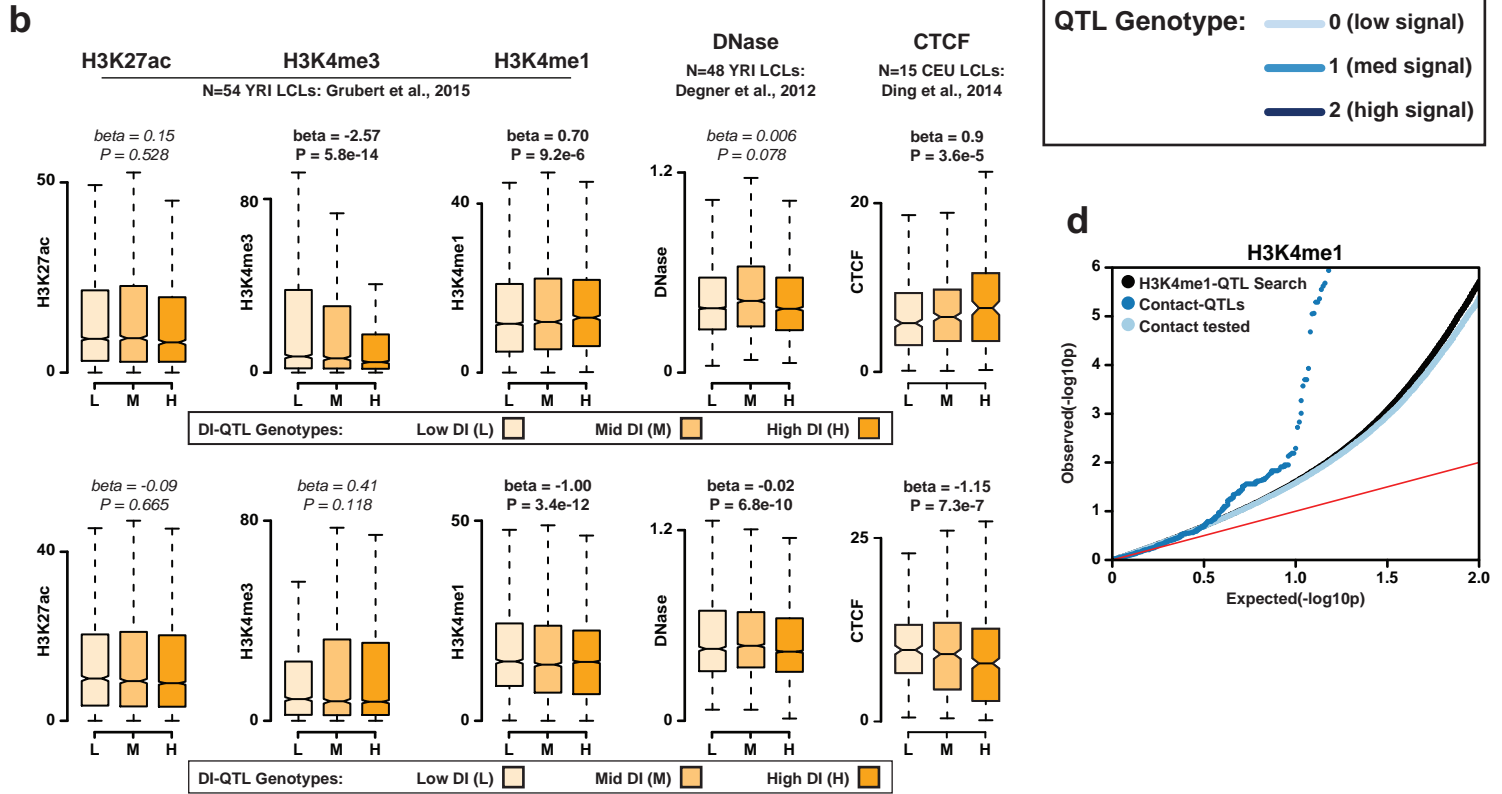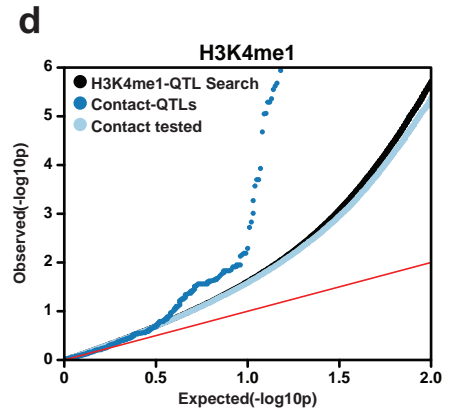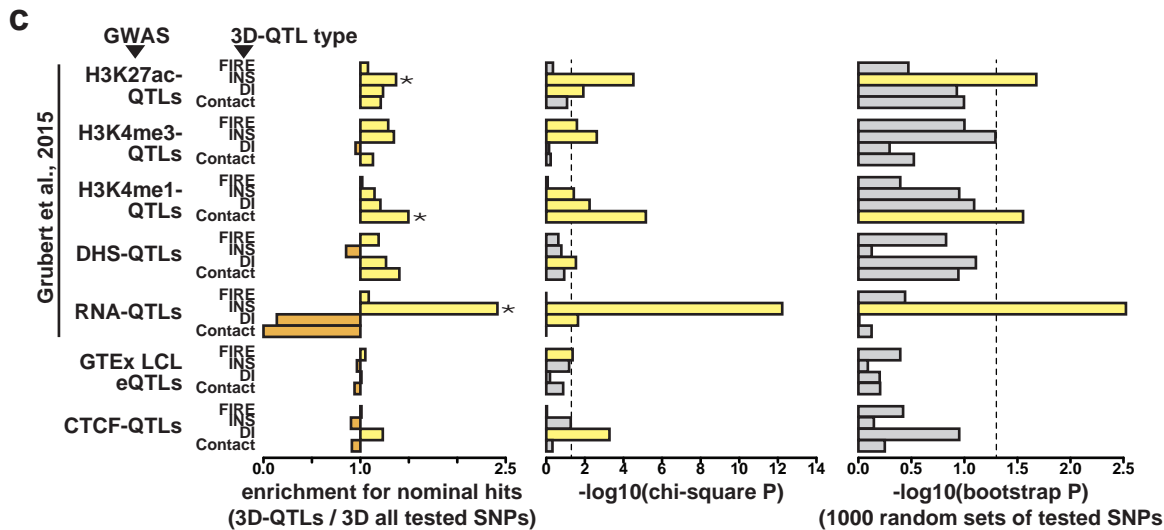

**Figure S10. Influence of 3D chromatin QTLs on epigenomic and disease phenotypes.**

(a) Similar schema to Figure 4e, but showing FIRE, INS, DI score (indicated on the Y axis) as a function of genotype for each QTL set as indicated above each column. Grey boxes highlight the cases plotted in Figure 4e where the signal type and QTL set are the same. (b) Similar schema to Figure 5a, but showing DI-QTLs in positive bins (top) and negative DI bins (bottom). (c) Left subpanel shows the enrichment for 3D QTL SNPs with nominal significance in the indicated epigenetic or eQTL study calculated as follows: (fraction of indicated 3D QTL SNPs with nominal significance in the indicated molQTL study) / (fraction of SNPs tested in the indicated 3D QTL search with nominal significance in the indicated molQTL study). Asterisks mark values with  $p < 0.05$  by chi-square test (middle panel), and permutation test (right panel). Right panel shows the proportion of 1,000 random SNP subsets (selected from the tested SNPs) with enrichment values higher than the indicated true QTL set. Dotted lines mark  $p < 0.05$ . (d) QQ plot shows the results of H3K4me1 QTL search from Grubert et al., with all tested SNPs shown as black points, and two subsets as follows: SNPs also tested in our C-QTL search (light blue), and SNP called as C-QTLs or in perfect LD with C-QTLs in the same 40Kb bin (dark blue).

- 1 Dixon, J. R. *et al.* Chromatin architecture reorganization during stem cell differentiation. *Nature* **518**, 331-336, doi:10.1038/nature14222 (2015).
- 2 Kasowski, M. *et al.* Extensive variation in chromatin states across humans. *Science* **342**, 750-752, doi:10.1126/science.1242510 (2013).
- 3 Hnisz, D. *et al.* Super-enhancers in the control of cell identity and disease. *Cell* **155**, 934-947, doi:10.1016/j.cell.2013.09.053 (2013).
- 4 McLean, C. Y. *et al.* GREAT improves functional interpretation of cis-regulatory regions. *Nat Biotechnol* **28**, 495-501, doi:10.1038/nbt.1630 (2010).
- 5 Ernst, J. *et al.* Mapping and analysis of chromatin state dynamics in nine human cell types. *Nature* **473**, 43-49, doi:10.1038/nature09906 (2011).
- 6 Ernst, J. & Kellis, M. ChromHMM: automating chromatin-state discovery and characterization. *Nature Methods* **9**, 215-216, doi:doi:10.1038/nmeth.1906 (2012).
- 7 Degner, J. F. *et al.* DNase I sensitivity QTLs are a major determinant of human expression variation. *Nature* **482**, 390-394, doi:10.1038/nature10808 (2012).
- 8 McVicker, G. *et al.* Identification of genetic variants that affect histone modifications in human cells. *Science* **342**, 747-749, doi:10.1126/science.1242429 (2013).
